# Supplementary figures and images for: Compound heterozygosity for two variants in BMP5 in human skeletal dysostosis with atrioventricular septal defect
Source: PubMed Central journal article supplement — Clin Genet. 2024 Sep 6;107(1):78–82. doi: 10.1111/cge.14616 (PMC11608849; doi:10.1111/cge.14616), 2024-09-06

**A**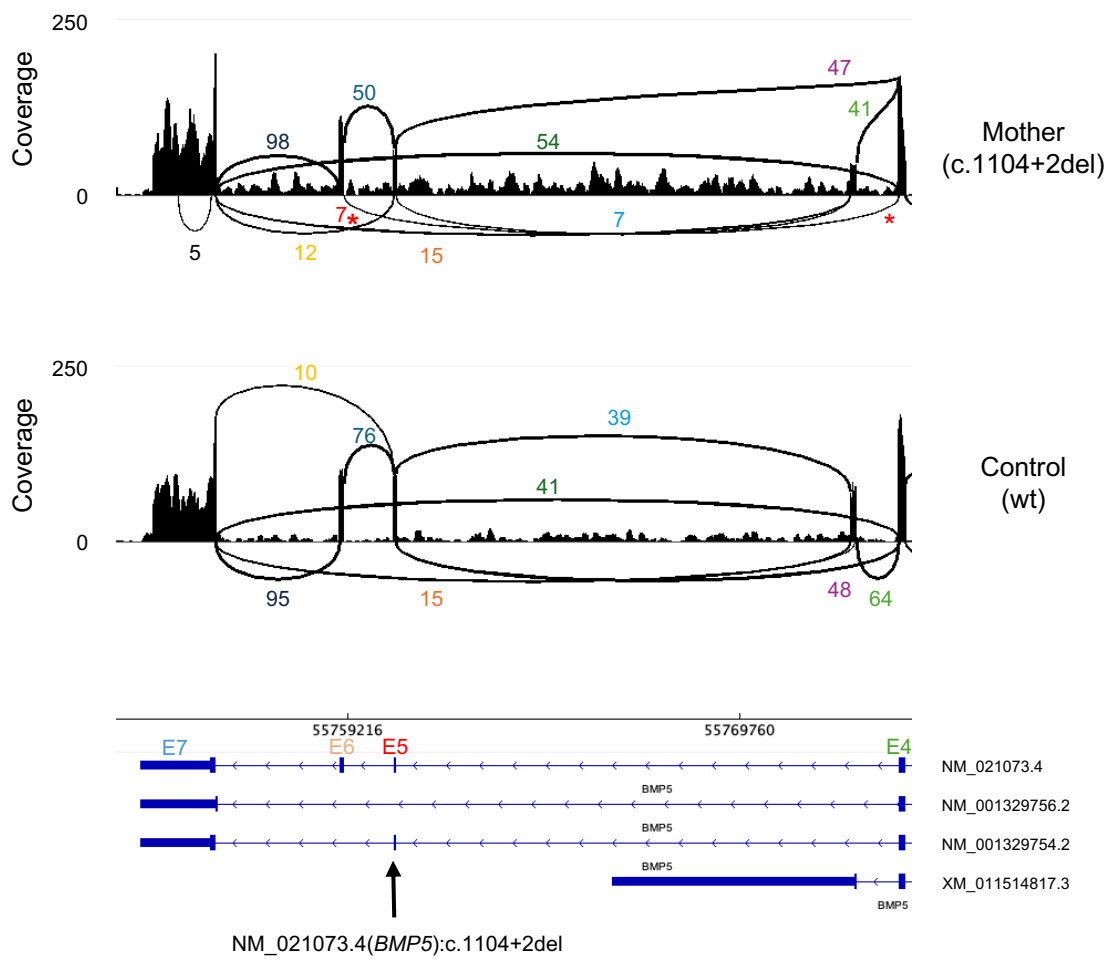**B**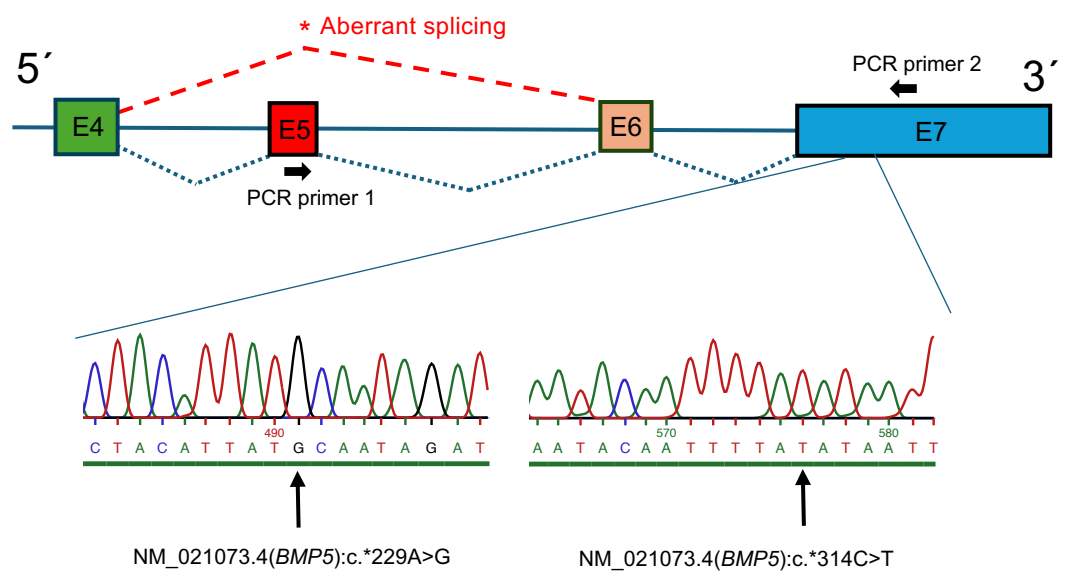

Supplement: CGE-107-78-s001.pdf [file CGE-107-78-s001.pdf]

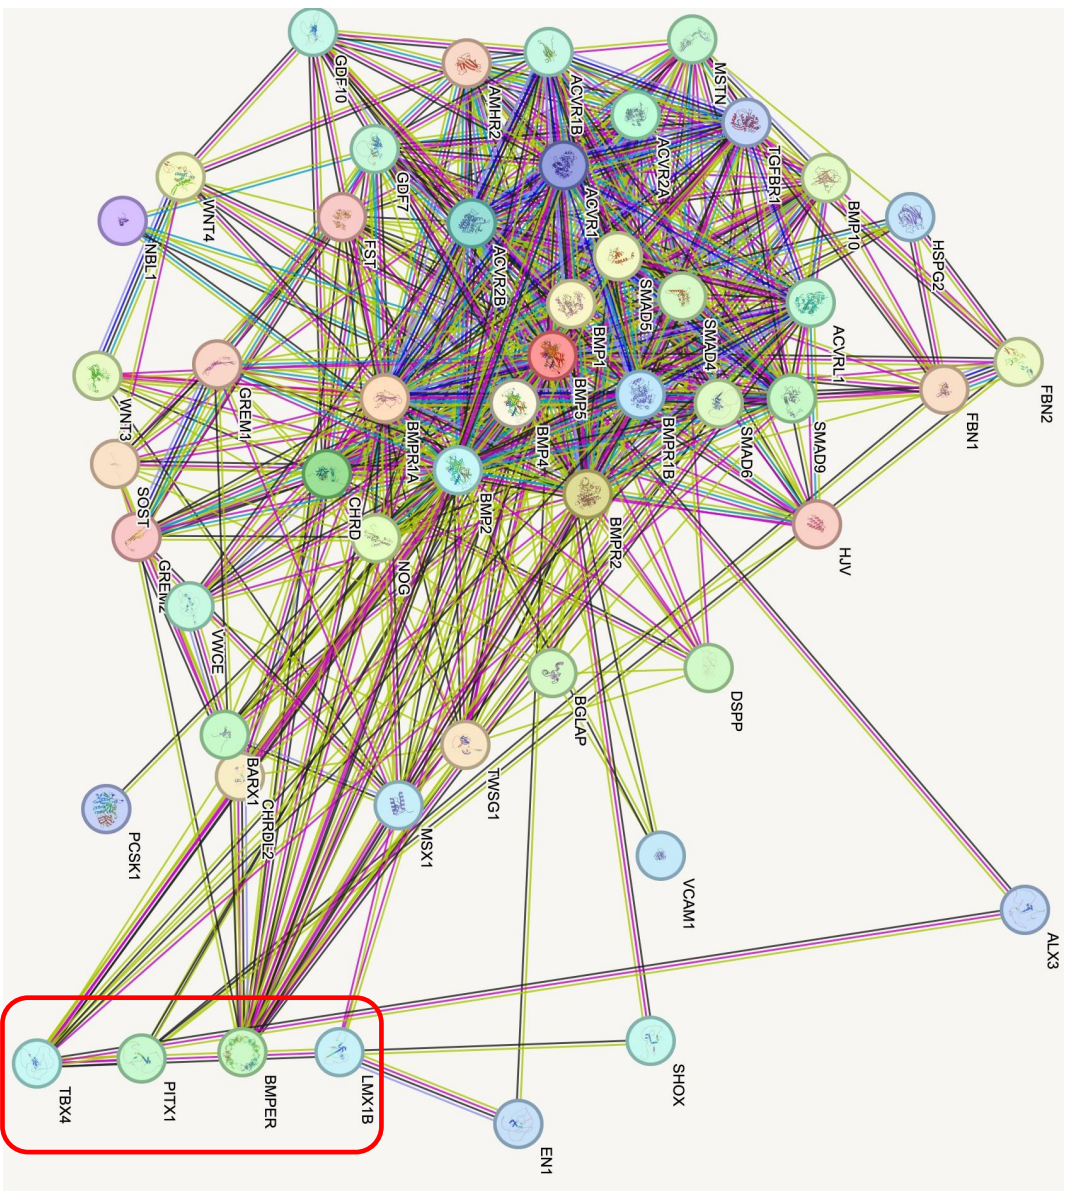

Supplement: CGE-107-78-s002.pdf [file CGE-107-78-s002.pdf]

**A**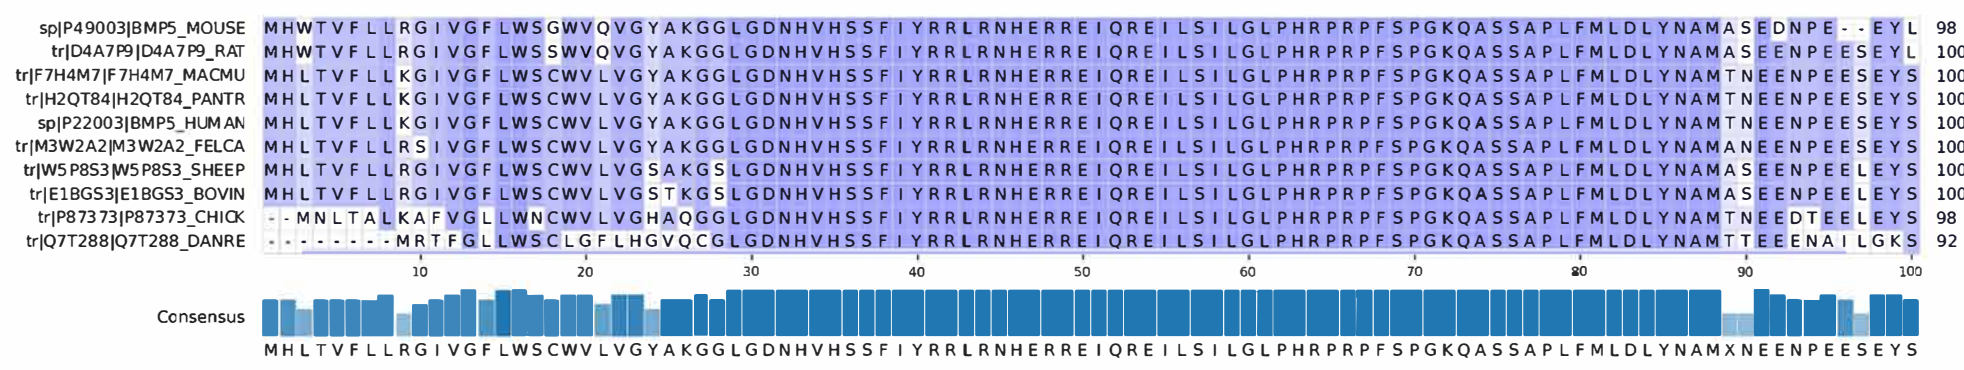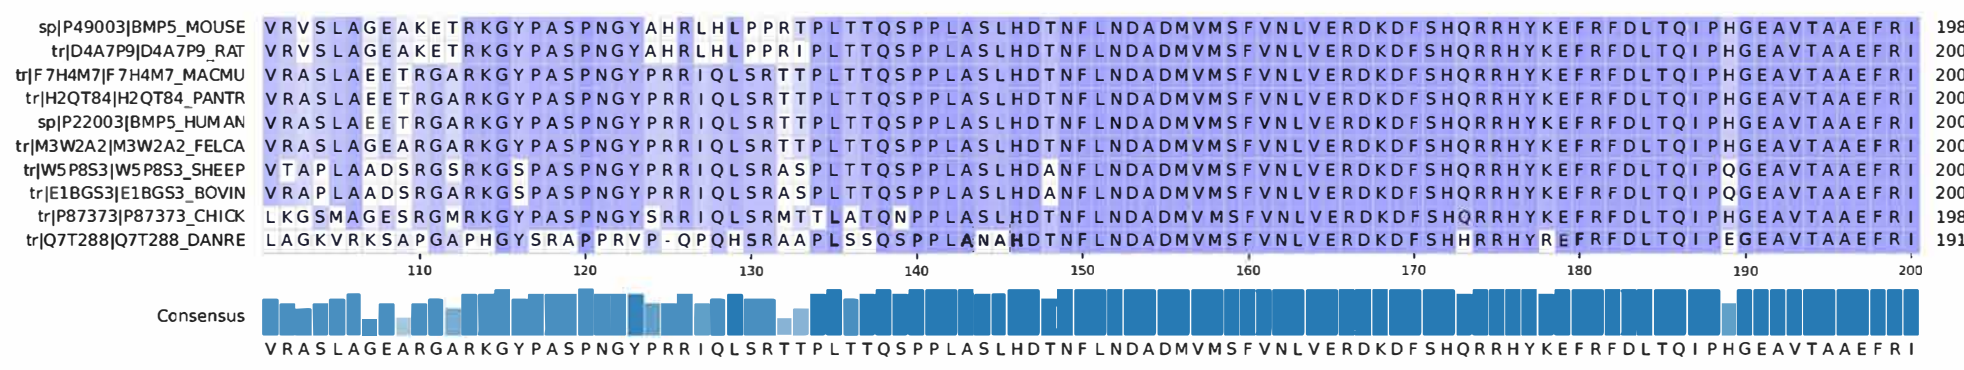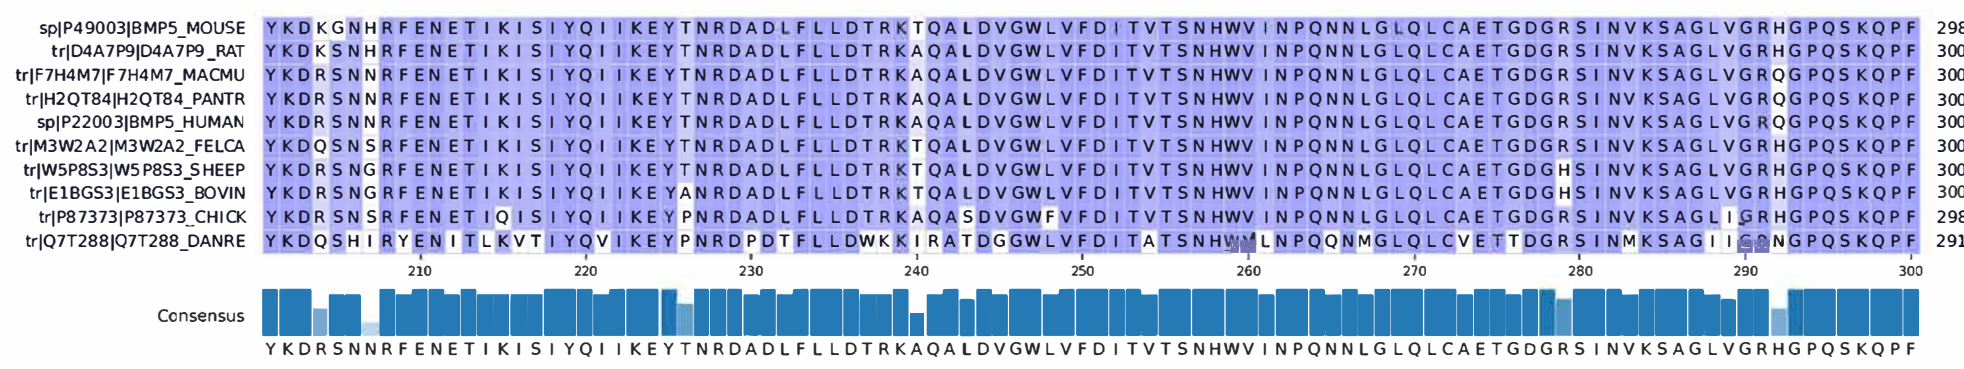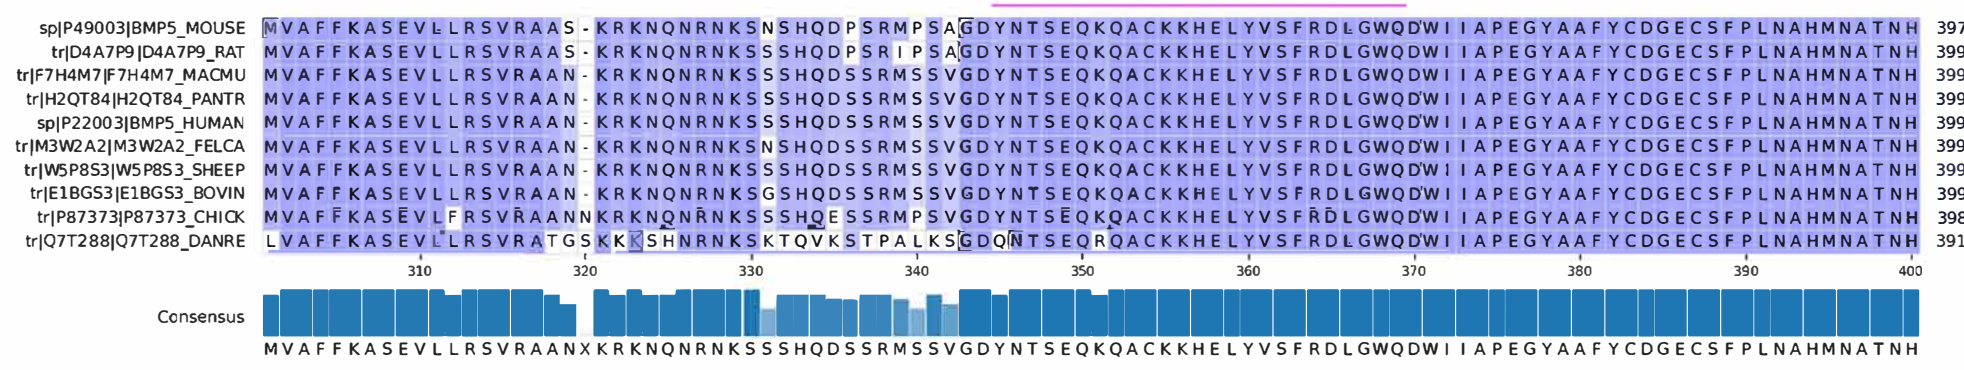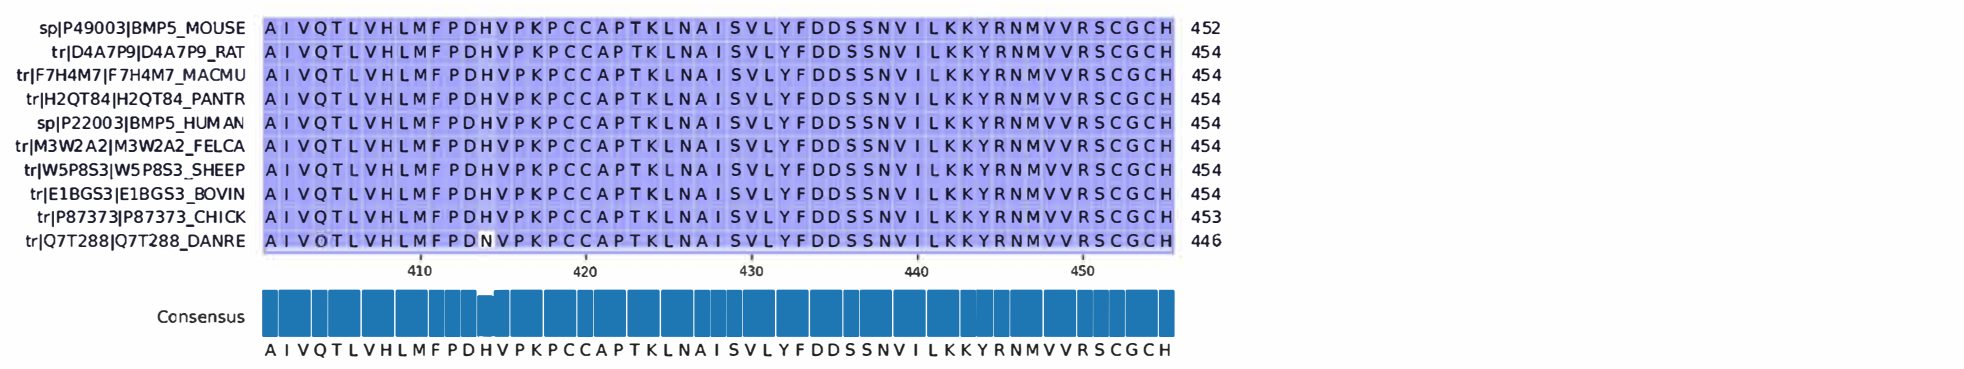**B**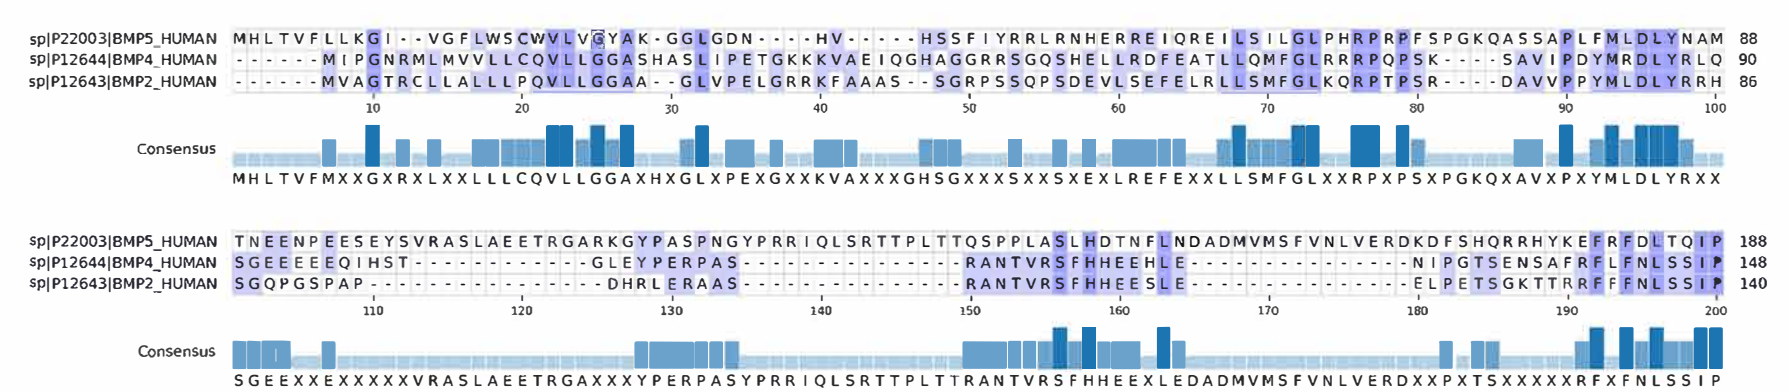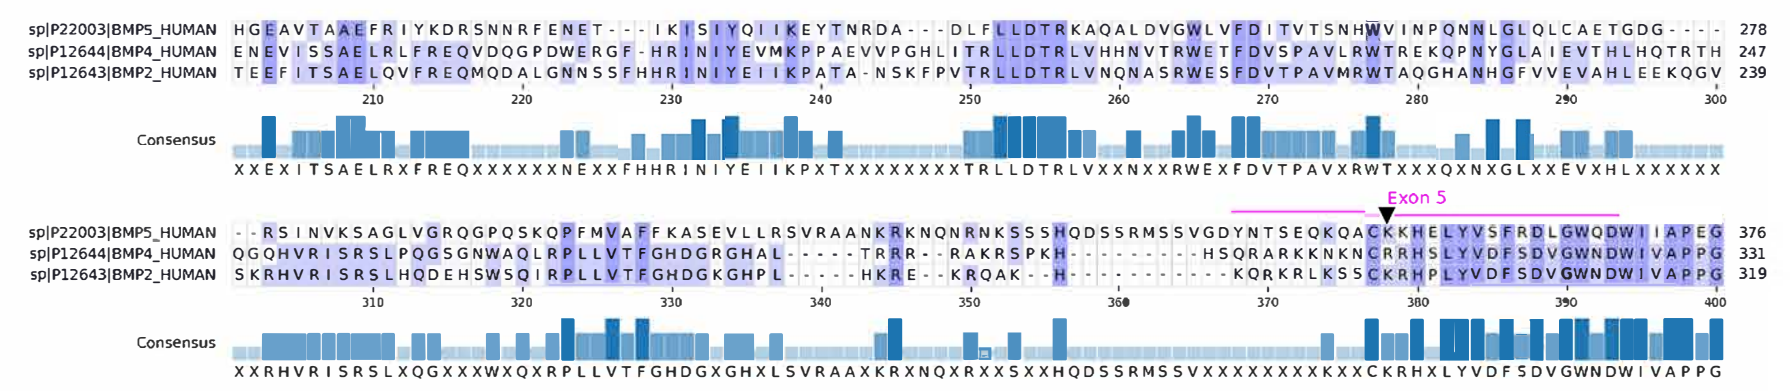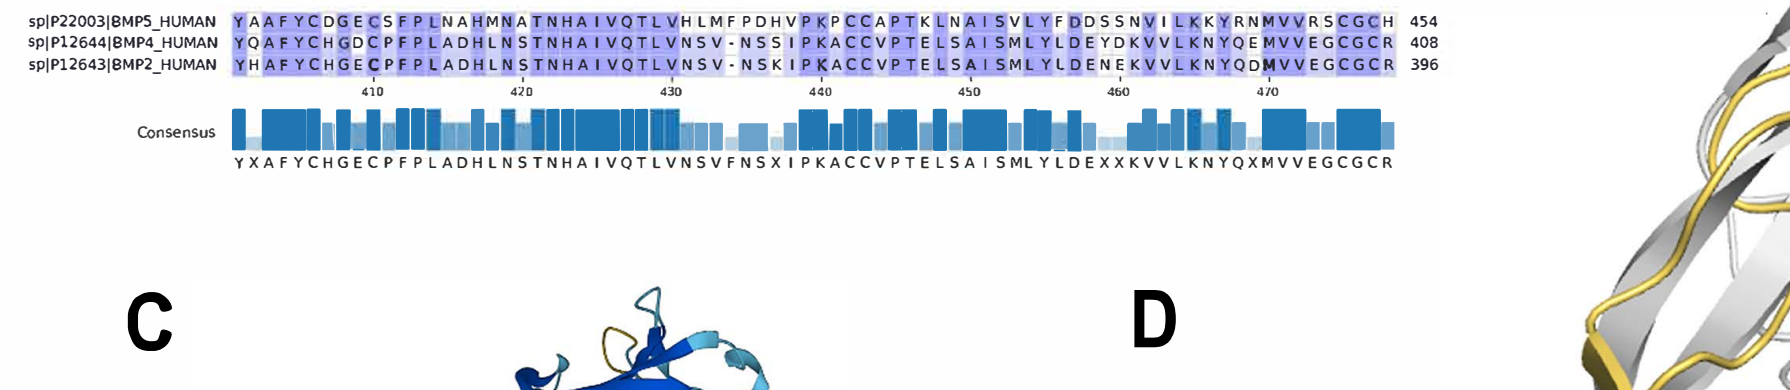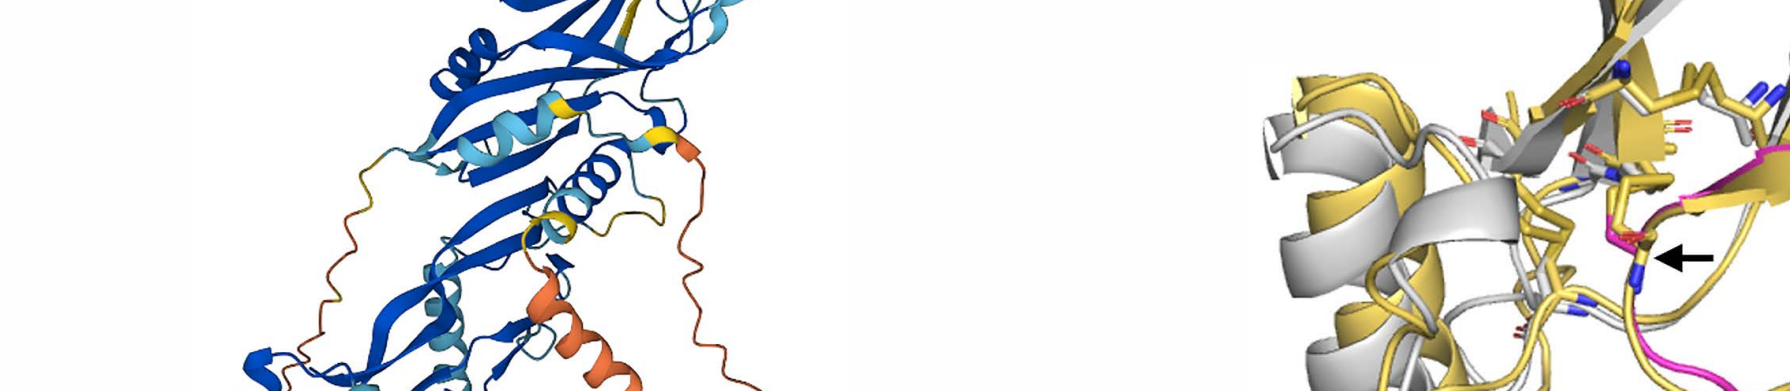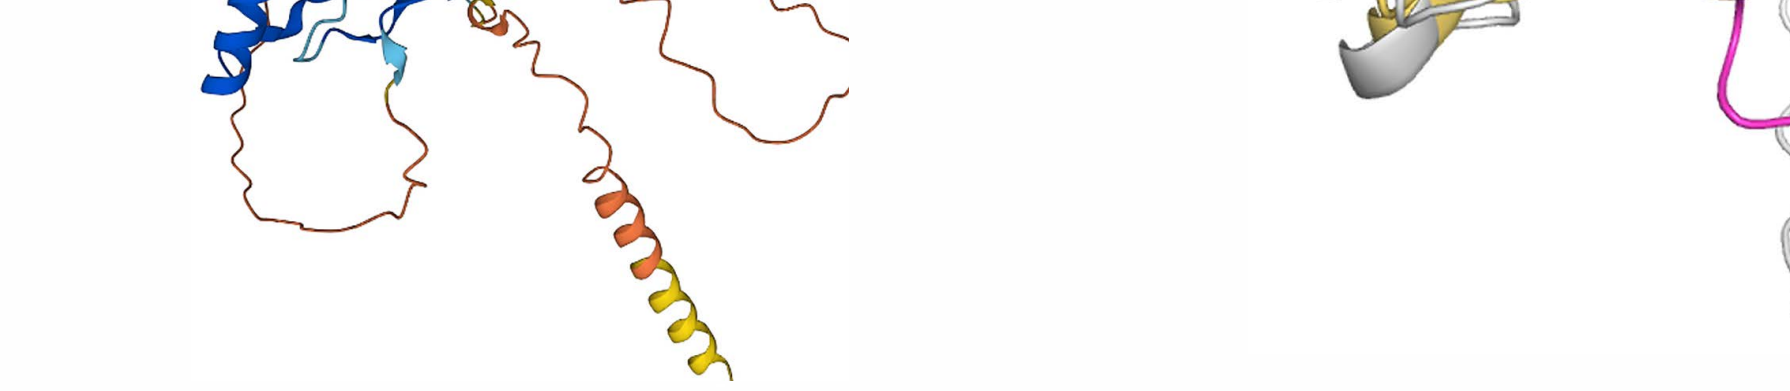**C**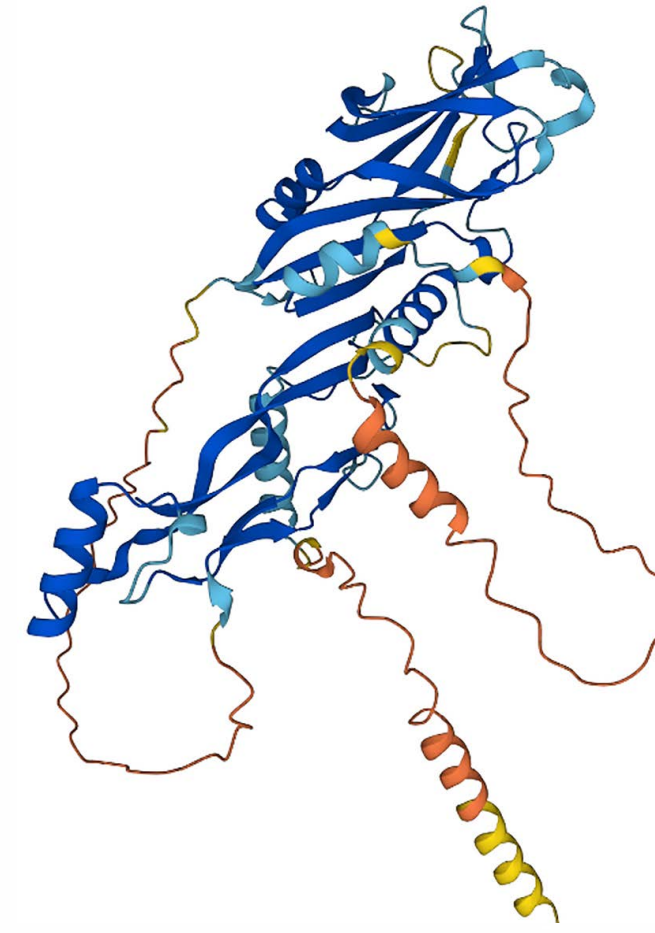**D**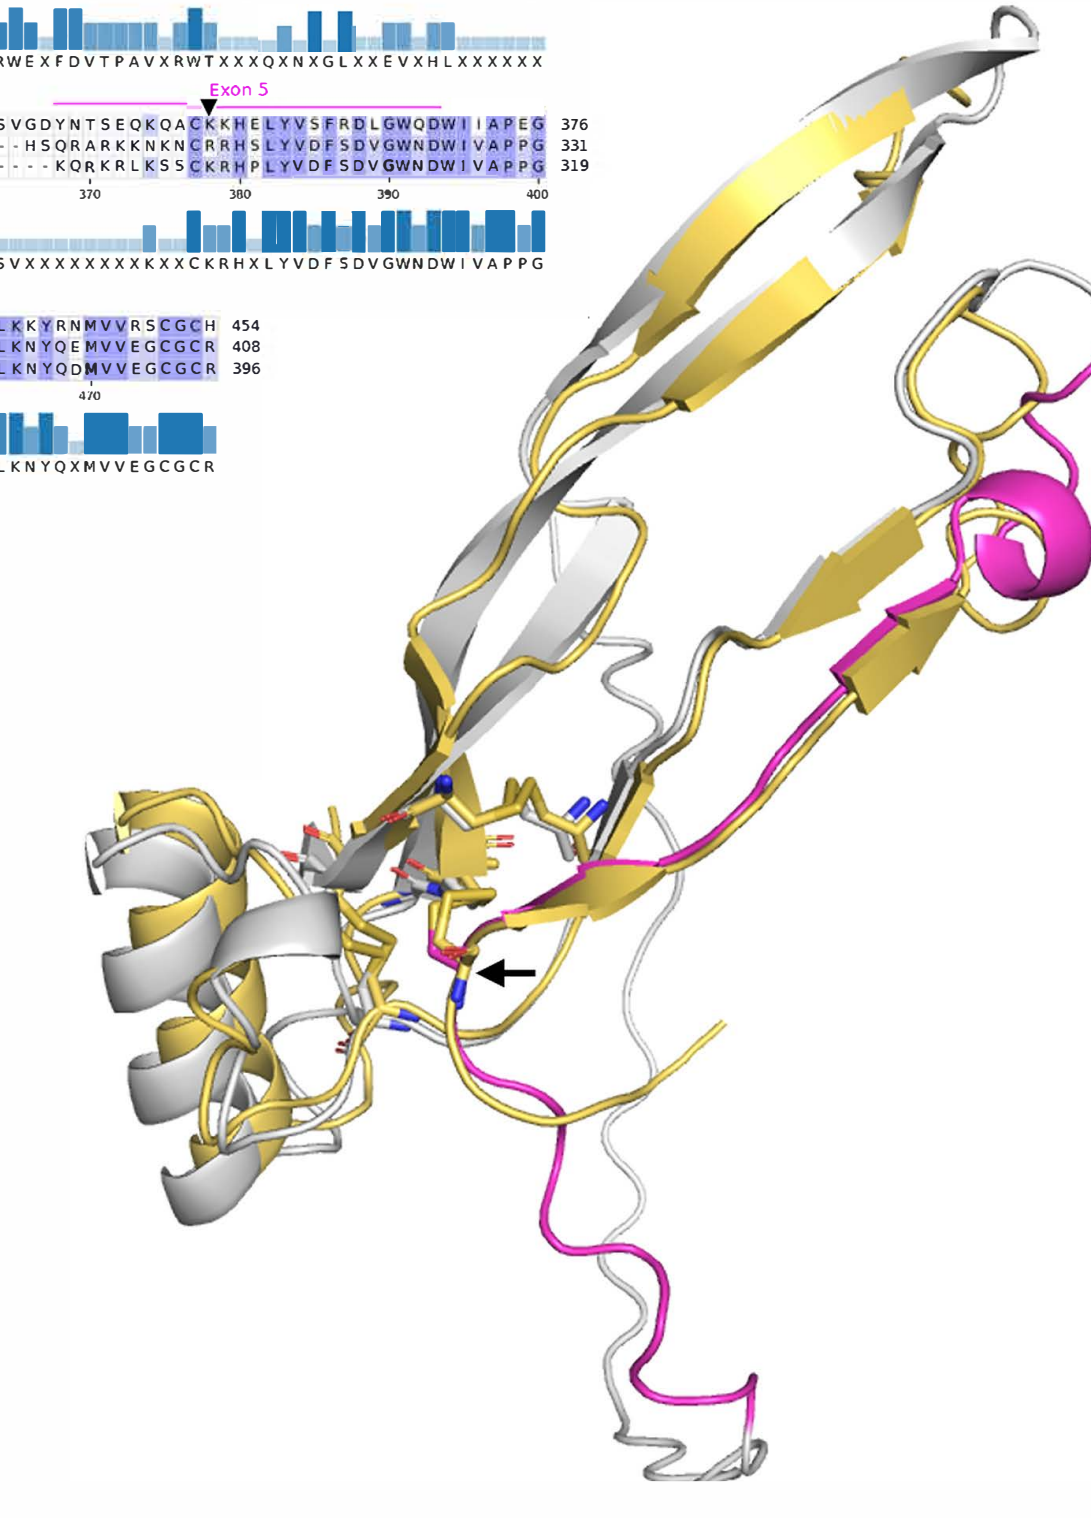

Supplement: CGE-107-78-s003.pdf [file CGE-107-78-s003.pdf]
